# Supplementary material for: The synthesis and characterization of a hexanuclear copper–yttrium complex for deposition of semiconducting CuYO2–0.5Cu2O composite thin films
Source: Royal Society of Chemistry journal article supplement (doi:10.1039/c4nj01602e), 2014-11-19
Supplement: c4nj01602e1.pdf [file c4nj01602e1.pdf]

##Supplementary Information##

**Synthesis and Characterization of  
Hexanuclear Copper-Yttrium Complex for  
Disposal to Semiconducting  $\text{CuYO}_2\text{-}0.5\text{Cu}_2\text{O}$   
Composite Thin Films<sup>†</sup>**

Cite this: DOI: 10.1039/x0xx00000x

Received 00th January 2012,  
Accepted 00th January 2012

DOI: 10.1039/x0xx00000x

www.rsc.org/

Sohail <sup>\*</sup>Ahmed,<sup>a</sup> Muhammad Adil Mansoor,<sup>a</sup> Wan Jeffrey Basirun,<sup>a,b</sup> Mehran Sookhakian,<sup>c</sup> Huang Nay Ming,<sup>c</sup> LO Kong Mun,<sup>a</sup> Tilo Söhnel,<sup>d,e</sup> Zainudin Arifin,<sup>a</sup> Muhammad Mazhar,

**Table S1.** Detail of crystal data of **1**.

|                             |                                                                                         |
|-----------------------------|-----------------------------------------------------------------------------------------|
| Chemical formula            | $\text{Y}_2 \text{Cu}_4 \text{C}_{53.70} \text{H}_{103.55} \text{N}_6 \text{O}_{23.85}$ |
| $M$ (g mol <sup>-1</sup> )  | 1646.95                                                                                 |
| Temperature (K)             | 100(2)                                                                                  |
| Crystal size (mm)           | 0.32×0.34×0.35                                                                          |
| Crystal color, habit        | blue blocks                                                                             |
| Crystal system              | Triclinic                                                                               |
| Space group                 | <i>P</i> -1                                                                             |
| $a$ (Å)                     | 9.4934(3)                                                                               |
| $b$ (Å)                     | 13.2045(4)                                                                              |
| $c$ (Å)                     | 14.6990(5)                                                                              |
| $\alpha$ (°)                | 76.486(2)                                                                               |
| $\beta$ (°)                 | 85.811(2)                                                                               |
| $\gamma$ (°)                | 83.394(2)                                                                               |
| $V$ (Å <sup>3</sup> )       | 1777.66(10)                                                                             |
| $Z$                         | 1                                                                                       |
| $D_c$ (mg m <sup>-3</sup> ) | 1.538                                                                                   |
| $\mu$ (mm <sup>-1</sup> )   | 2.863                                                                                   |
| $F(000)$                    | 853                                                                                     |

|                          |               |
|--------------------------|---------------|
| $\Theta$ range (deg)     | 1.43 to 27.99 |
| $h$ range                | -12/12        |
| $k$ range                | -17/17        |
| $l$ range                | -19/19        |
| no. refls. (independent) | 42393 (8530)  |
| no. parameters           | 437           |
| $R_{\text{int}}$         | 0.0461        |
| $R_1$ (obs.)             | 0.0277        |
| $wR_2$ (all data)        | 0.0720        |
| $S$                      | 1.029         |

---

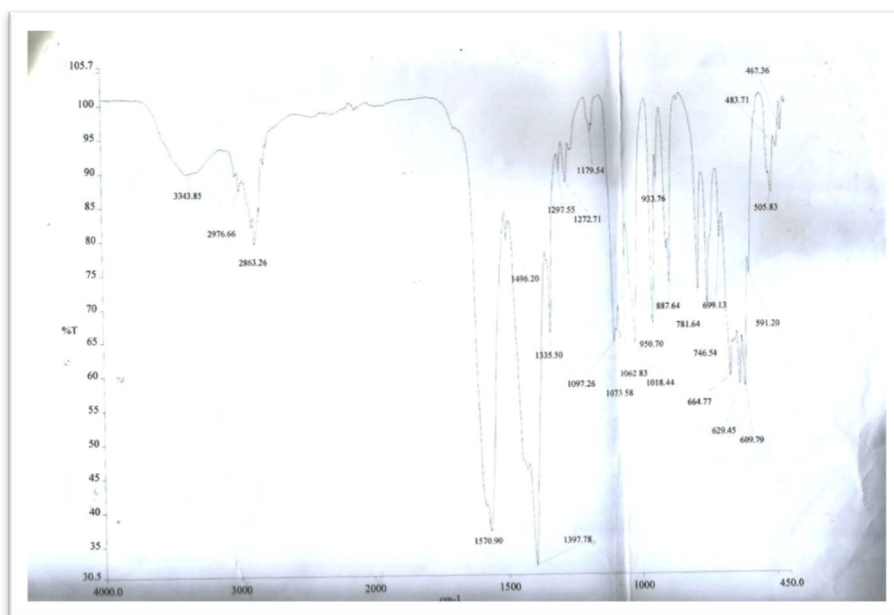

**Figure S1:** FT-IR spectrum of complex [Cu<sub>4</sub>Y<sub>2</sub>(dmae)<sub>6</sub>(OAc)<sub>7.85</sub>(OH)<sub>0.15</sub>(H<sub>2</sub>O)<sub>2</sub>].2CH<sub>3</sub>C<sub>6</sub>H<sub>5</sub> (**1**)

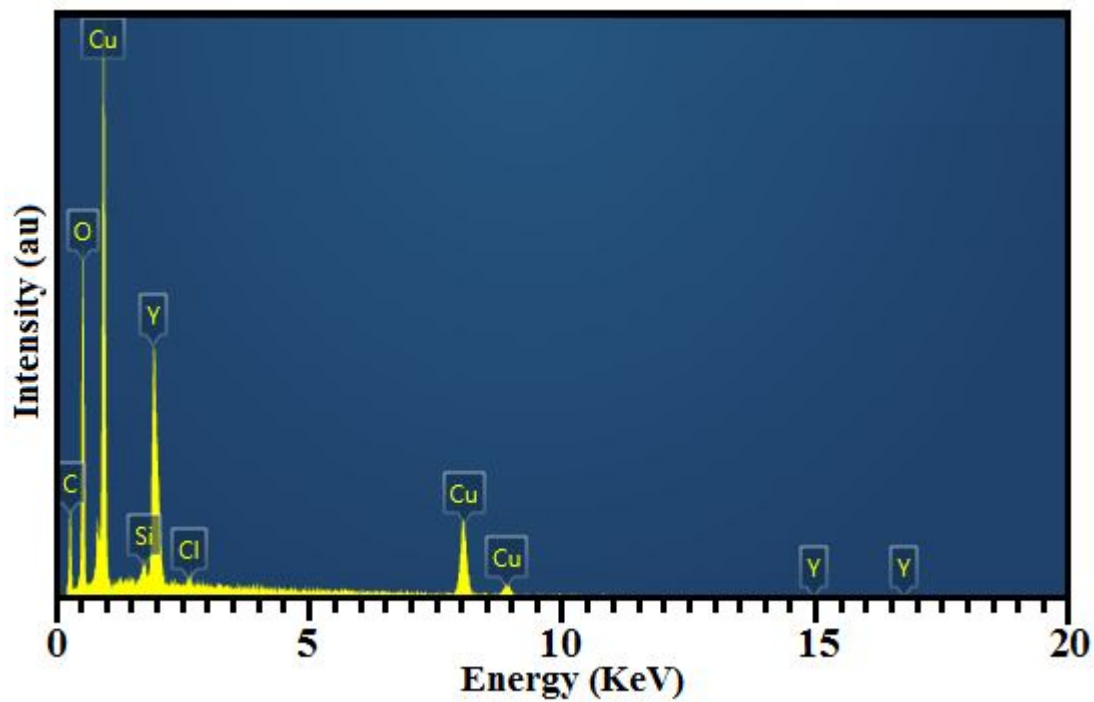

**Figure S2:** EDX of  $\text{CuYO}_2\text{-}0.5\text{Cu}_2\text{O}$  thin film fabricate from (1) at  $400^\circ\text{C}$ .
